1 **Mixing crop residues induces a synergistic effect on microbial biomass and an additive**  
2 **effect on soil organic matter priming**

3 **Xin Shu<sup>1</sup>, Yiran Zou<sup>1</sup>, Liz J. Shaw<sup>1</sup>, Lindsay Todman<sup>2</sup>, Mark Tibbett<sup>2</sup>, and Tom Sizmur<sup>1\*</sup>**

4 1. Department of Geography and Environmental Science, University of Reading, UK.

5 2. Department of Sustainable Land Management and Soil Research Centre, School of Agriculture,  
6 Policy and Development, University of Reading, UK.

7 \*Corresponding author – [t.sizmur@reading.ac.uk](mailto:t.sizmur@reading.ac.uk) +44(0)118 3788913

8 **Abstract**

9 Applying crop residues is a widely used strategy to increase soil organic matter (SOM) in  
10 arable soils because of its recorded effects on increasing microbial biomass and  
11 consequently necromass. However, fresh residue inputs could also “prime” the  
12 decomposition of native SOM, resulting in accelerated SOM depletion and greenhouse gas  
13 (GHG) emission. Increasing the botanical diversity of the crops grown in arable systems has  
14 been promoted to increase the delivery of multiple ecological functions, including increasing  
15 soil microbial biomass and SOM. Whether mixtures of fresh residues from different crops  
16 grown in polyculture contribute to soil carbon (C) pools to a greater extent than would be  
17 expected from applying individual residues (i.e., the mixture produces a non-additive  
18 synergistic effect) has not been systematically tested and is currently unknown. In this study,  
19 we used <sup>13</sup>C isotope labelled cover crop residues (i.e., buckwheat, clover, radish, and  
20 sunflower) to track the fate of plant residue-derived C and C derived from the priming of  
21 SOM in treatments comprising a quaternary mixture of the residues and the average effect  
22 of the four individual residues one day after residue incorporation in a laboratory

23 microcosm experiment. Our results indicate that, despite all treatments receiving the same  
24 amount of plant residue-derived C (1 mg C g<sup>-1</sup> soil), the total microbial biomass in the  
25 treatment receiving the residue mixture was significantly greater, by 26% (3.69 μg C g<sup>-1</sup>),  
26 than the average microbial biomass observed in treatments receiving the four individual  
27 components of the mixture one day after applying crop residues. The greater microbial  
28 biomass C in the quaternary mixture, compared to average of the individual residue  
29 treatments, that can be attributed directly to the plant residue applied was also significantly  
30 greater, by 132% (3.61 μg C g<sup>-1</sup>). However, there was no evidence that the mixture resulted  
31 in any more priming of native SOM than average priming observed in the individual residue  
32 treatments. The soil microbial community structure, assessed using phospholipid fatty acid  
33 (PLFA) analysis, was significantly ( $P < 0.001$ ) different in the soil receiving the residue  
34 mixture, compared to the average structures of the communities in soil receiving four  
35 individual residues. Differences in the biomass of fungi, general bacteria, and Gram-positive  
36 bacteria were responsible for the observed synergistic effect of crop residue mixtures on  
37 total microbial biomass and residue-derived microbial biomass, especially biomarkers 16:0,  
38 18:2ω6 and 18:3ω3. Our study demonstrates that applying a mixture of crop residues  
39 increases soil microbial biomass to a greater extent than would be expected from applying  
40 individual residues and that this occurs either due to faster decomposition of the crop  
41 residues or greater carbon use efficiency (CUE), rather than priming the decomposition of  
42 native SOM. Therefore, growing crop polycultures (e.g., cover crop mixtures) and  
43 incorporating mixtures of the resulting crop residues into the soil could be an effective  
44 method to increase microbial biomass and ultimately C stocks in arable soils.

45 **Key words:** diverse, mixture, synergistic, <sup>13</sup>C-PLFA, crop residues

## 46 **1. Introduction**

47 Soil organic carbon (SOC) plays a critical role in global carbon (C) dynamics in the earth  
48 system and is a major property influencing soil functions and health. Applying crop residues  
49 to soils is a common strategy used in agroecosystems to enhance SOC stocks (Chapman and  
50 Newman, 2010; Chen et al., 2015). When microorganisms decompose plant litter and use  
51 the C for metabolism, they catabolise a portion of this C, which is usually released as carbon  
52 dioxide (CO<sub>2</sub>), and simultaneously assimilate and anabolise a portion of C into their biomass.  
53 After their death, microbial necromass returns to soil and contributes to SOC storage (Liang  
54 et al., 2020). However, applying fresh crop residues could also stimulate microbial  
55 decomposition of native SOM via co-metabolism or mining for nutrients, resulting in a  
56 priming effect (Kuzyakov, 2010; Wang et al., 2015). A recent meta-analysis including 2048  
57 individual experimental comparisons from 94 laboratory incubation studies revealed that  
58 the addition of exogenous organic C significantly enhanced native SOC decomposition, by  
59 47.5%, in terrestrial ecosystems, with the highest priming effect observed in arable soils  
60 (60.9%) (Sun et al., 2019). Therefore, using crop residues to maximize SOC stocks requires a  
61 consideration of the impact of amendments on SOC priming.

62 Previous studies have investigated the C mass balance after the application of plant residues  
63 of a single plant species (Rubino et al., 2010; Shahbaz et al., 2018). However, crop residues  
64 returned to soils under arable land management practices such as intercropping, rotations,  
65 and cover crops include the residues of more than one plant species. Based on studies  
66 examining decomposition dynamics in soils receiving mixed species residues, it cannot  
67 necessarily be assumed that the application of a crop residue mixture will have the same  
68 impact on C dynamics as predicted from observations made on the impact of the individual

69 residues (Gartner and Cardon, 2004; Porre et al., 2020). If the behaviour or effect of a  
70 residue mixture can be predicted from the behaviour of the individual residues, this is  
71 classified as an additive effect (Redin et al., 2014). By contrast, a mixture could also deliver  
72 an antagonistic non-additive effect (i.e. the mixture's effect is less than the average of  
73 individual species) or a synergistic non-additive effect (i.e. the mixture's effect is greater  
74 than the average of individual species), which suggests there are interactions, via microbial  
75 decomposers, among the constituents of the mixture (Redin et al., 2014).

76 A majority of the previous studies have explored the effects of mixtures on litter  
77 decomposition and associated C cycling and nutrient release (e.g. nitrogen mineralization  
78 and immobilization) by focusing on leaf litter decomposition in forest ecosystems (Castro-  
79 Díez et al., 2019; Gartner and Cardon, 2004; Mao et al., 2017). Even the most recent meta-  
80 analysis on litter mixtures only focused on litter mass loss due to decomposition (Porre et al.,  
81 2020). To better understand the mechanisms of plant species diversification on soil C  
82 dynamics, we need to fill the knowledge gap regarding mixture effects on the microbial fate  
83 of C supplied by individual components of the mixture and the potential for interactions of  
84 residue C with older soil organic matter (SOM) via priming effects.

85 The mechanisms responsible for non-additive effects in residue mixture decomposition  
86 dynamics are not fully understood and might depend strongly on the context within which  
87 the study was conducted (Porre et al., 2020). To explain non-additive effects, processes  
88 relating to nutrient transfer between nutrient-rich (low C:N) and nutrient poor (high C:N)  
89 litters, transfer of inhibitory compounds from one species' litter to another, or physical  
90 (water retention) effects have been frequently mentioned (Porre et al., 2020). In addition,  
91 mixing chemically contrasting crops may provide a greater number of niches for

92 microorganisms to exploit, which allows functionally dissimilar microbial communities to  
93 coexist, and thus result in a greater microbial diversity and biomass than might be expected  
94 from the average of the individual communities that are supported by monocultures  
95 (Chapman and Newman, 2010). Although greater diversity not always linked to greater  
96 biomass, a recent meta-analysis found that in temperate regions, where soil is not rich in C,  
97 greater microbial diversity is usually associated with greater microbial biomass due to  
98 facilitation and niche partitioning by supporting the co-existence of multiple microbial  
99 species (Bastida et al., 2021). An increased microbial diversity could increase the probability  
100 of including taxa particularly influential in extracellular enzyme production for nutrient  
101 mining and SOM degradation through metabolic and co-metabolic processes. Furthermore,  
102 an increased microbial biomass could also result in stronger SOM mineralization as a  
103 consequence of increased microbial metabolic activity (Bastida et al., 2021). Thus, mixtures  
104 of crop residues could enhance the extent to which soil microbial communities mine  
105 nutrients for SOM and lead to a greater priming effect. By contrast, some studies showed  
106 that mixtures of diverse plant residues have a greater opportunity to provide preferable  
107 growth substrates for microbes (e.g., if the average C/N ratio of residues is close to 24),  
108 thereby offsetting the extent to which SOM decomposition is primed and decreasing  
109 microbial anabolism of primed SOM (Xiao et al., 2015). These two mechanisms (i.e.,  
110 increasing or offsetting priming effect) could occur simultaneously and combine to  
111 determine the overall magnitude of the priming effect.

112 In this study, we investigated the residues of four functionally dissimilar crops from four  
113 different plant families (i.e., buckwheat, clover, radish, and sunflower) which are widely  
114 grown in mixtures as cover crops in agricultural systems. We established a microcosm

115 experiment comprising treatments receiving either mixtures or individual (non-mixture)  $^{13}\text{C}$   
116 labelled cover crop residues which provided the same amount of residue-derived C (1 mg C  
117  $\text{g}^{-1}$  soil). Soil phospholipid fatty acid (PLFA) analysis was undertaken one day after  
118 incorporating crop residues to quantify the biomass of key soil microbial groups. Gas  
119 chromatography-combustion-stable isotope mass spectrometry (GC-C-IRMS) was used to  
120 identify the microbial groups that had incorporated residue-derived C and, by mass balance,  
121 quantify the amount of primed SOM-derived C which was incorporated into the microbial  
122 biomass. The difference between the mixture and the average of four non-mixtures enabled  
123 us to determine whether the mixture delivered either a synergistic (mixture > average), an  
124 antagonistic (mixture < average), or an additive (mixture = average) effect.

125 We assumed that microbes have no preference for  $^{13}\text{C}$  over  $^{12}\text{C}$ . Because a mixture of crop  
126 residues may increase the niche breadth and provide a more diverse supply of nutrients,  
127 thereby creating conditions enhancing the growth and facilitation of multiple co-exist  
128 microorganisms. Thus, we hypothesised that the mixture could result in a synergistic effect  
129 on total microbial biomass. Compared to individual species, the mixture has higher  
130 probability to provide preferable growth substrates which could be more easily assimilated  
131 into microbial biomass, and thus we would expect a synergistic effect of the mixture on the  
132 microbial biomass derived from plant residues. Given that the cover crop species tested had  
133 divergent C:N ratios (ranging between 10 and 32 and spanning the threshold C:N ( $\approx 24$ ) for  
134 net N mineralization- immobilization (Norton and Schimel, 2011), we hypothesised that  
135 adding residues in a mixture (average C/N = 17) would decrease the requirement for  
136 microorganisms to prime native SOM to scavenge for N and therefore induce an  
137 antagonistic effect on the microbial biomass C derived from primed SOM.

138 **2. Materials and methods**

139 **2.1. Soil samples and crop residues**

140 A silty loam Luvisol (World Reference Base classification); pH (H<sub>2</sub>O) 6.3, 22.32 g C kg<sup>-1</sup>, 2.24 g  
141 N kg<sup>-1</sup>, 0.90 mg NH<sub>4</sub><sup>+</sup> -N kg<sup>-1</sup>, 2.75 mg NO<sub>3</sub><sup>-</sup> -N kg<sup>-1</sup> was collected from an arable field on the  
142 University of Reading's research farm at Sonning, Reading, UK (51.481152, -0.902188) in  
143 August 2019 after harvesting spring barley (*Hordeum vulgare*). Seven surface soil samples  
144 (0-20 cm depth) were randomly sampled and mixed thoroughly to create one homogenous  
145 sample, approximately 20 kg in weight.

146 Four cover crops, buckwheat (*Fagopyrum esculentum*), berseem clover (*Trifolium*  
147 *alexandrinum*), oil radish (*Raphanus raphanistrum*), and sunflower (*Helianthus annuus*),  
148 were continuously and uniformly labelled with <sup>13</sup>C<sub>2</sub>O<sub>2</sub> in growth chambers by IsoLife  
149 (Wageningen, Netherlands). Buckwheat and clover were harvested 5 weeks after sowing,  
150 while radish and sunflower were harvested after 4 weeks. The <sup>13</sup>C atom percent of the  
151 resulting aboveground biomass was 6.7%, 7.8%, 7.8%, and 8.0% for buckwheat, clover,  
152 radish, and sunflower, respectively. Corresponding unlabelled crops were grown under the  
153 same conditions in growth chambers by IsoLife (Wageningen, Netherlands), and harvested  
154 at the same time. After harvesting, the aboveground residues of both <sup>13</sup>C labelled and  
155 unlabelled crops were dried at 70 °C and milled to pass through 0.05 mm mesh. The  
156 chemical composition of <sup>13</sup>C labelled and unlabelled residues is provided in Table S1.

157 **2.2. Experimental design**

158 Soil was sieved to pass a 4 mm mesh and then pre-incubated for 7 days at 26 °C with a soil  
159 water content of 60% of the water holding capacity (0.22 g g<sup>-1</sup>). As indicated in Table 1, the  
160 treatments consisted of pure unlabelled residues, labelled non-mixture residues, quaternary

161 mixtures of residues which contained one labelled species and three unlabelled species, and  
162 a control without any crop residue additions. For each treatment receiving residues, four  
163 replicate microcosms were established by mixing 150 g of fresh soil (equivalent to 122.95 g  
164 dry soil) thoroughly with a mass of dry residues to ensure C was added to each microcosm  
165 at a rate of 1 mg C g<sup>-1</sup> soil. In the pure treatments, all the added C was from the same  
166 unlabelled residue sample. In the non-mixture treatments, 25% of added C was from the <sup>13</sup>C  
167 labelled residue and 75% of added C was from the unlabelled residue of the same crop  
168 species. In the mixture treatments, 25% of added C was from a <sup>13</sup>C labelled crop and 75% of  
169 added C comprised unlabelled residues from the other three crop species.

170 For the measurement of soil respiration, a 100 g subsample was transported from each  
171 microcosm to a bulk density ring (98 cm<sup>3</sup>), stored in a gas-tight plastic jar (365 cm<sup>3</sup>), and  
172 kept open during incubation. The rest of sample was kept in an opened plastic bag for the  
173 measurement of PLFA. Both measurements of PLFA and soil respiration were taken one day  
174 after applying cover crop residues.

175 To measure soil respiration, jars were sealed with a Suba-Seal® Septa for 1 h and a 16 ml  
176 headspace gas sample was taken from each jar using a syringe and hypodermic needle,  
177 transferred into pre- evacuated vials, and analysed with gas chromatography (Agilent 7890B,  
178 UK) (Adekanmbi et al., 2020). The universal gas law was used to determine the amount of  
179 CO<sub>2</sub> (ng g<sup>-1</sup> soil h<sup>-1</sup>) emitted from each jar.



180 **Table 1 Experimental design and the C/N ratio of added crop residues in each treatment**

| Treatment | Plant     | Abbreviation | Description                                                                    | Added <sup>13</sup> C amount (mg C g <sup>-1</sup> soil) | C/N ratio |
|-----------|-----------|--------------|--------------------------------------------------------------------------------|----------------------------------------------------------|-----------|
| Non-mix   | Buckwheat | NB           | 25% labelled + 75% unlabelled buckwheat                                        | 0.0168                                                   | 10        |
| Non-mix   | Clover    | NC           | 25% labelled + 75% unlabelled clover                                           | 0.0195                                                   | 32        |
| Non-mix   | Radish    | NR           | 25% labelled + 75% unlabelled radish                                           | 0.0195                                                   | 18        |
| Non-mix   | Sunflower | NS           | 25% labelled + 75% unlabelled sunflower                                        | 0.0200                                                   | 19        |
| Mix       | Buckwheat | MB           | 25% labelled buckwheat, 75% of unlabelled residues (clover, radish, sunflower) | 0.0168                                                   | 17        |
| Mix       | Clover    | MC           | 25% labelled clover, 75% unlabelled residues (buckwheat, radish, sunflower)    | 0.0195                                                   | 17        |
| Mix       | Radish    | MR           | 25% labelled radish, 75% unlabelled residues (buckwheat, clover, sunflower)    | 0.0195                                                   | 17        |
| Mix       | Sunflower | MS           | 25% labelled sunflower, 75% unlabelled residues (buckwheat, clover, radish)    | 0.0200                                                   | 17        |
| Pure      | Buckwheat | PB           | %100 unlabelled buckwheat                                                      | \                                                        | 9         |
| Pure      | Clover    | PC           | %100 unlabelled clover                                                         | \                                                        | 30        |
| Pure      | Radish    | PR           | %100 unlabelled radish                                                         | \                                                        | 21        |
| Pure      | Sunflower | PS           | %100 unlabelled sunflower                                                      | \                                                        | 22        |
| Soil      |           |              | Soil only without any plant residue addition                                   | \                                                        | \         |

181 *Note: 25% and 75% refers to proportion of total added C. The quantity of C added was the same across all treatments apart from the soil treatment, which*  
 182 *was 1 mg C g<sup>-1</sup> soil. The C/N ratio in the mixture treatments were the average of four types of mixture treatments.*

183

### 184 **2.3. Phospholipid-derived fatty acids (PLFA) extraction**

185 One day after incubation with soil and crop residues, a 10 g aliquot of soil was sampled from  
186 each replicate plastic bag and freeze-dried for downstream analysis of PLFA. PLFA was  
187 extracted following the method described by Sizmur et al. (2011). Briefly, 4 g of freeze-dried  
188 soil was extracted with 7.8 ml of Bligh and Dyer extractant containing chloroform: methanol:  
189 citrate buffer (1:2:0.8 v/v/v). The extracted phospholipids were methanolized as fatty-acid  
190 methyl esters and dissolved in hexane for analysis by gas chromatography (GC).

### 191 **2.4. Gas chromatography (GC)**

192 PLFA methyl esters were analysed using an Agilent Technologies 6890N gas chromatography  
193 equipped with a Supercowax 10 capillary GC column (60 m × 0.25 mm i.d. × 0.25 µm film  
194 thickness) and a Flame Ionisation Detector (FID). Helium was the carrier gas. The  
195 temperature programme was 1-minute isothermal at 60 °C, followed by a ramp to 145 °C at  
196 25 °C per minute, followed by an increase to 250 °C at 2.5 °C per minute and then held  
197 isothermally at 310 °C for 10 minutes. Data were processed using GC ChemStation (Agilent  
198 Technologies). Peaks were identified using a bacterial fatty acid methyl esters (BAME) mix  
199 (Sigma Aldrich, UK) and quantified using a 37-component fatty acid methyl esters (FAME)  
200 mix (Sigma Aldrich, UK). The biomass of each group of microorganisms was determined  
201 using the combined mass of fatty acids to which the group is attributed in Table S2.

### 202 **2.5. Gas chromatography- combustion-isotope ratio mass spectrometry (GC-C-IRMS)**

203 GC-C-IRMS analysis were performed by injecting a 1 µl sample of fatty-acid methyl esters  
204 into an Agilent 7890N GC, upstream of a DELTA V™ Isotope Ratio Mass Spectrometer  
205 (electron ionization, 100 eV, 1 mA electron energy, 3 F cup collectors m/z 44, 45 and 46,  
206 CuO/Pt Thermofisher GC IsoLink interface maintained at 1000°C). A Nafion membrane was

207 employed to prevent water from reaching the ion source. GC conditions were the same as  
208 that described above. Samples were calibrated against reference CO<sub>2</sub> of known isotopic  
209 composition, which was introduced directly into the source five times at the beginning and  
210 end of every run. Data was processed in the Isodat Gas Isotope Ratio MS Software  
211 (ThermoFisher Scientific) to generate  $\delta^{13}\text{C}$  values representing the ratio of  $^{13}\text{C}/^{12}\text{C}$  in fatty-  
212 acid methyl esters, relative to the  $^{13}\text{C}/^{12}\text{C}$  ratio of the international Pee Dee Belemnite (PDB)  
213 standard (0.01118).

214  $\delta^{13}\text{C}$  values obtained for methylated compounds were corrected for the addition of  
215 derivative C using the mass balance equation following equation 1 to 3 (Zhang et al., 2019):

$$\delta^{13}C_{PLFA}(\text{‰}) = [(N_{PLFA} + 1) \times \delta^{13}C_{FAME} - \delta^{13}C_{MeOH}] / N_{PLFA} \quad (\text{Eq 1})$$

$$R_{\text{sample}} = (\delta^{13}C_{PLFA} / 1000 + 1) \times R_{PDB} \quad (\text{Eq 2})$$

$$F = R / (R + 1) \quad (\text{Eq 3})$$

216

217 where  $\delta^{13}C_{PLFA}$ ,  $\delta^{13}C_{FAME}$ , and  $\delta^{13}C_{MeOH}$ , were the  $\delta^{13}\text{C}$  value of PLFA, FAME and methanol  
218 ( $\delta^{13}C_{MeOH}$  was assumed to equal zero), respectively.  $N_{PLFA}$  was the number of C atoms in this  
219 fatty acid to which the fatty acid methyl ester corresponds.  $R_{\text{sample}}$  and  $R_{PDB}$  were the ratios  
220 of  $^{13}\text{C}/^{12}\text{C}$  in sample and in PDB.  $F$  is the fractional isotopic abundance representing the  
221 concentration of  $^{13}\text{C}$  as a proportion of the total concentration of C in the PLFA.

222 Equation 4 was used to calculate how much  $^{13}\text{C}$  ( $\mu\text{g } ^{13}\text{C g}^{-1}$  soil) was incorporated into PLFA  
223 biomass in the non-mixture treatments:

13C incorporation ( $\mu\text{g } ^{13}\text{C} / \text{g soil}$ ) in non – mixture (Eq 4)

$$= F_{\text{non-mixture}} \times C_{\text{non-mixture}} - F_{\text{pure}} \times C_{\text{pure}}$$

224  $F_{\text{non-mixture}}$  and  $F_{\text{pure}}$  were the fractional abundances of  $^{13}\text{C}$  in a non-mixture treatment its  
225 corresponding pure unlabelled treatment, respectively.  $C_{\text{non-mixture}}$  and  $C_{\text{pure}}$  were the  
226 concentration of PLFAs ( $\mu\text{g C g}^{-1}$  soil) in the non-mixture and its corresponding pure  
227 unlabelled treatment, which were the results of GC-FID analysis. For example,  $^{13}\text{C}$   
228 incorporation in the non-mixture of buckwheat (NB) equals to  $F_{\text{NB}} \times C_{\text{NB}} - F_{\text{PB}} \times C_{\text{PB}}$

229 For each mixture treatment, there was 75% of added C from three different unlabelled  
230 residues (25% from each residue). The resulting  $^{13}\text{C}$  incorporation ( $\mu\text{g } ^{13}\text{C g}^{-1}$  soil) of these  
231 unlabelled residues was accounted for using equation 5.

13C incorporation ( $\mu\text{g } ^{13}\text{C} / \text{g soil}$ ) in mix (Eq

$$= F_{\text{mix}} \times C_{\text{mix}} - 0.25 \times (F_{\text{PB}} \times C_{\text{PB}} + F_{\text{PC}} \times C_{\text{PC}} + F_{\text{PR}} \times C_{\text{PR}} + F_{\text{PS}} \times C_{\text{PS}}) \quad 5)$$

232 where  $F_{\text{mix}}$  was the fractional abundances of  $^{13}\text{C}$  in mixture treatment.  $F_{\text{PB}}$ ,  $F_{\text{PC}}$ ,  $F_{\text{PR}}$ ,  $F_{\text{PS}}$ , were  
233 the fractional abundances of  $^{13}\text{C}$  in pure unlabelled buckwheat, clover, radish, and sunflower  
234 treatment, respectively.  $C_{\text{mix}}$ ,  $C_{\text{PB}}$ ,  $C_{\text{PC}}$ ,  $C_{\text{PR}}$ ,  $C_{\text{PS}}$ , were the concentration of PLFAs ( $\mu\text{g C g}^{-1}$  soil)  
235 in the treatments of mixture, pure buckwheat, pure clover, pure radish, and pure sunflower,  
236 which were analysed by GC-FID.

237 The proportion (unitless) of  $^{13}\text{C}$  incorporated from total amount of added  $^{13}\text{C}$  was calculated  
238 using equations 6 and 7:

$$\begin{aligned} \text{Total amount of added } ^{13}\text{C} (\mu\text{g } ^{13}\text{C} / \text{g soil}) & \quad (\text{Eq} \\ & = \text{Total added C} \times \text{Proportion of } ^{13}\text{C} \text{ labelled residue} \quad 6) \\ & \times ^{13}\text{C atom percent of labelled residue} \end{aligned}$$

$$\text{PLFA proportion of added } ^{13}\text{C} = \frac{\text{ } ^{13}\text{C incorporation}}{\text{Total amount of added } ^{13}\text{C}} \quad (\text{Eq} \\ 7)$$

239 where total added C was 1000  $\mu\text{g C g}^{-1}$  soil, the proportion of  $^{13}\text{C}$  labelled residue was 0.25.  
240 The  $^{13}\text{C}$  atom percent was 6.7%, 7.8%, 7.8% and 8.0% for buckwheat, clover, radish, and  
241 sunflower residues, respectively. This brings the total amount of added  $^{13}\text{C}$  to 16.75, 19.50,  
242 19.50, and 20.00  $\mu\text{g } ^{13}\text{C g}^{-1}$  soil, for treatments which received 25% of their added C from  $^{13}\text{C}$   
243 labelled buckwheat, radish, clover, and sunflower.

244  $^{13}\text{C}$  is a tracer to track the amount of C derived from crop residues and incorporated into  
245 PLFA biomass. Assuming microorganisms have no preference for  $^{12}\text{C}$  over  $^{13}\text{C}$ , the proportion  
246 of PLFA incorporated  $^{13}\text{C}$  from added  $^{13}\text{C}$  should also be the same to the proportion of PLFA  
247 incorporated  $^{12}\text{C}$  from total added  $^{12}\text{C}$ . Following this logic, in all the non-mixture treatments,  
248 the amount of C incorporated into PLFA derived from added crop residue C was calculated  
249 using equation 8:

$$\begin{aligned} \text{PLFA derived from residues in non - mixture } (\mu\text{g C/g soil}) & \quad (\text{Eq} \\ & = \text{PLFA proportion of added } ^{13}\text{C} * 1000 \mu\text{g C/g soil} \quad 8) \end{aligned}$$

250 where 1000  $\mu\text{g C g}^{-1}$  soil was the total added amount of C (equal to 1  $\text{mg C g}^{-1}$  soil).

251 In the mixture treatment, the  $^{13}\text{C}$  labelled residue contributed 25% of the added C (i.e., 250  
252  $\mu\text{g C g}^{-1}$  soil). The proportion of  $^{13}\text{C}$  in each type of mixture (calculated by equation 7) was

253 multiplied by 250 ( $\mu\text{g C g}^{-1}$  soil) to get the amount of PLFA derived from this  $^{13}\text{C}$  labelled crop.  
254 We then added up the amount of PLFA derived from each type of  $^{13}\text{C}$  labelled crop to form  
255 the PLFA which was derived from the mixture of crop residues (equation 9).

$$\begin{aligned} & \text{PLFA derived from residues in mixture } (\mu\text{g C/g soil}) && \text{(Eq 9)} \\ & = (\text{Proportion}_{MB} + \text{Proportion}_{MC} + \text{Proportion}_{MR} + \text{Proportion}_{MS}) && 9) \\ & * 250 \mu\text{g C/g soil} \end{aligned}$$

256 where  $\text{proportion}_{MB}$ ,  $\text{proportion}_{MC}$ ,  $\text{proportion}_{MR}$ , and  $\text{proportion}_{MS}$  represent the  
257 proportion (unitless) of  $^{13}\text{C}$  incorporated from added  $^{13}\text{C}$  in four types of mixture treatments  
258 where each type was  $^{13}\text{C}$ -labelled by buckwheat, clover, radish, and sunflower, separately.

259 The PLFA derived from primed SOM was calculated as the difference between the total PLFA  
260 (measured using GC-FID), PLFA derived from residues, and PLFA in the control soil without  
261 any residue addition using equation 10.

$$\begin{aligned} & \text{PLFA derived from SOM priming } (\mu\text{g C/g soil}) && \text{(Eq 10)} \\ & = \text{total PLFA} - \text{PLFA derived from residues} - \text{PLFA in the soil only treatment} \end{aligned}$$

262 where total PLFA and PLFA in the soil only treatment were analysed by GC-FID and  
263 converted to  $\mu\text{g C g}^{-1}$  soil.

264 For mixture treatment, because there were only four samples have crop residue-derived  
265 PLFA, to calculate SOM-derived PLFA, we created a general mixture of which total PLFA was  
266 the average of total PLFA in four different types of mixture in the same replicate as  
267 calculated by equation 11.

$$\begin{aligned} & \text{Total PLFA in mixture } (\mu\text{g C/g soil}) && \text{(Eq 11)} \\ & = 0.25 * (\text{total PLFA}_{MB} + \text{total PLFA}_{MC} + \text{total PLFA}_{MR} + \text{total PLFA}_{MS}) \end{aligned}$$

268 Therefore, there were four replicates for total PLFA, residue derived PLFA, and SOM derived  
269 PLFA in the general mixture.

## 270 **2.6. Data analysis**

271 All the statistics were conducted in R (version 3.5.2) (R Core Team, 2018) except for the  
272 analysis of similarity (ANOSIM) which was conducted in Primer 7 (Primer-e, Auckland, New  
273 Zealand). We used nested analysis of variance (ANOVA) to compare the effect from the  
274 quaternary mixtures with the effect from the average of the four non-mixture treatments  
275 on total PLFA biomass, the PLFA biomass incorporated from crop residues, and the PLFA  
276 biomass incorporated from primed SOM.

277 To compare the difference in microbial community structure between the mixture and the  
278 average of four individuals, PLFA data measured by GC-FID was “Hellinger” transformed in  
279 all treatments. Non-metric multidimensional scaling (NMDS) on Bray-Curtis distance of the  
280 transformed data was performed using the “vegan” package in R (Oksanen et al., 2019).  
281 Bray-Curtis distance similarity matrices were analysed by a one-way analysis of similarity  
282 (ANOSIM) using Primer 7 to test if the differences between the mixture and the average of  
283 four non-mixture treatments were significant.

## 284 **3. Results**

### 285 **3.1 Crop residues increased soil microbial biomass and altered community structure**

286 The incorporation of cover crop residues significantly ( $P < 0.001$ ) shifted the microbial  
287 community structure away from the unamended control soil (Figure S1). The incorporation  
288 of residues from different crop species lead to significantly ( $P < 0.05$ ) different community  
289 structures (Figure S1). The biomass of general bacteria, Gram-positive bacteria, and fungi in  
290 the unamended control soil was 1.80, 2.20, and 2.36  $\mu\text{g C g}^{-1}$ , respectively, which was

291 greater than the biomass of Gram-negative bacteria and protozoa (Table S3). Despite the  
292 same rate of C addition applied across all the treatments, total PLFA biomass differed  
293 between residue amendment treatments; ranging from 11.66 to 18.93  $\mu\text{g C g}^{-1}$ , which was  
294 significantly ( $P < 0.05$ ) greater than that in the control soil (Table S3).

### 295 3.2 Mixing crop residues increased total PLFA biomass and altered microbial 296 community structure

297 Total PLFA biomass was 17.74 and 14.05  $\mu\text{g C g}^{-1}$  for the mixture and the average of four  
298 non-mixture treatments, respectively (Figure 1). The soils in the mixture treatments had a  
299 significantly ( $P < 0.05$ ) greater total microbial biomass, by 26% (3.69  $\mu\text{g C g}^{-1}$ ), compared to  
300 the soils in the non-mixture treatments (Figure 1 and Table 2).

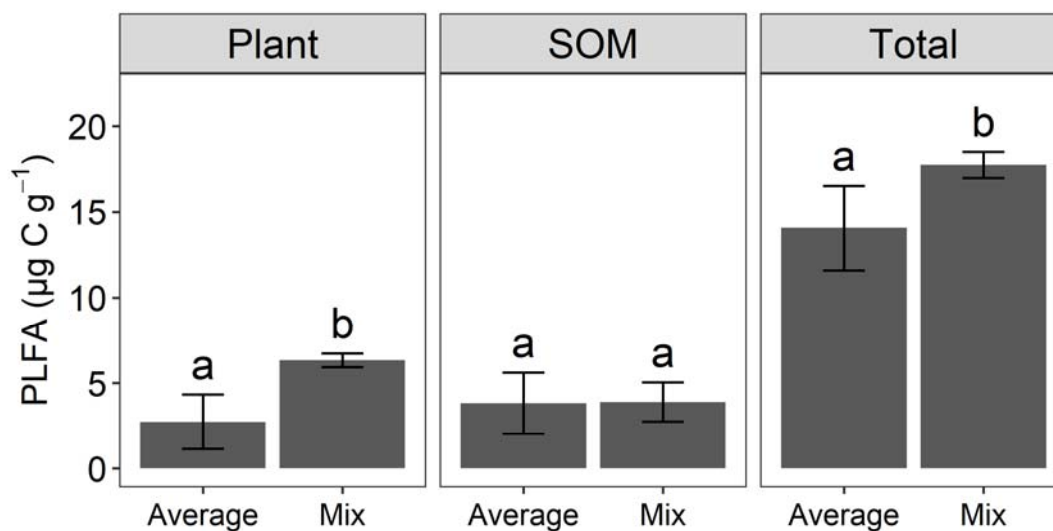

301

302 **Figure 1** Total PLFA biomass (Total), PLFA biomass incorporated from crop residues (Plant),  
303 and the PLFA biomass incorporated from soil organic matter (SOM) in the mixture and the average  
304 of four non-mixture treatments. Error bars are standard deviations. Different letters within the  
305 same panel indicate a significant difference between treatment means at  $P < 0.05$ .



306

307 **Table 2** NEST ANOVA (treatment nested with crop species) to compare the effects of mixture and the species of plant on total PLFA, crop residue-  
 308 derived PLFA, and SOM (soil organic matter)- derived PLFA at different microbial groups. MIX has two levels (mix or non-mix), crop species have five  
 309 levels (radish, clover, buckwheat, sunflower, and mixture). DF is the degree of freedom. Values are F value. \*, \*\*, and \*\*\* represent significant level at  $P$   
 310  $< 0.05$ ,  $0.01$ , and  $0.001$ . G+ and G- bacteria are Gram-positive and Gram-negative bacteria, respectively.

| <b>Total PLFA</b>                 |    |             |                  |             |             |         |          |       |                |
|-----------------------------------|----|-------------|------------------|-------------|-------------|---------|----------|-------|----------------|
|                                   | DF | Sum of PLFA | General bacteria | G+ bacteria | G- bacteria | Fungi   | Protozoa | G+/G- | Fungi/Bacteria |
| Treatment                         | 1  | 15.16**     | 9.16**           | 12.54**     | 0.07        | 9.66**  | 0.12     | 0.17  | 1.80           |
| Treatment:Species                 | 3  | 5.78**      | 2.13             | 9.55***     | 4.32*       | 2.69    | 0.95     | 3.46* | 4.01*          |
| <b>Crop residue- derived PLFA</b> |    |             |                  |             |             |         |          |       |                |
| Treatment                         | 1  | 20.62***    | 16.93***         | 4.64*       | 0.19        | 11.43** | 0.22     | 0.40  | 0.02           |
| Treatment:Species                 | 3  | 1.36        | 0.12             | 1.34        | 2.66        | 1.41    | 0.85     | 0.71  | 0.4            |
| <b>SOM- derived PLFA</b>          |    |             |                  |             |             |         |          |       |                |
| Treatment                         | 1  | 0.01        | 0.07             | 1.33        | 0.00        | 0.03    | 0.01     | 0.44  | 0.53           |
| Treatment:Species                 | 3  | 2.72        | 2.14             | 3.97*       | 3.53*       | 1.48    | 0.81     | 1.08  | 2.63           |

311

312 The mixture treatment resulted in a significantly ( $P < 0.001$ ) greater general bacteria, Gram-  
313 positive bacteria, and fungi biomass by 31% ( $1.07 \mu\text{g C g}^{-1}$ ), 18% ( $0.62 \mu\text{g C g}^{-1}$ ), and 38%  
314 ( $1.90 \mu\text{g C g}^{-1}$ ), respectively, than the average of the non-mixture treatments (Figure 2). In  
315 particular, biomarkers i15:0, 16:0, 18:1 $\omega$ 9, 18:2 $\omega$ 6 and 18:3 $\omega$ 3 were significantly ( $P < 0.05$ )  
316 more abundant in the mixture treatment than the average of four non-mixture treatments  
317 (Figure 3). The ratios of fungi to bacteria in the mixture and the average of the four non-  
318 mixture treatments were 0.64 and 0.57, which was not significantly different (Figure S2).  
319 Similarly, there was no significant difference in the ratio of Gram-positive to Gram-negative  
320 bacteria between the mixture and the average of four non-mixture treatments (Figure S3).

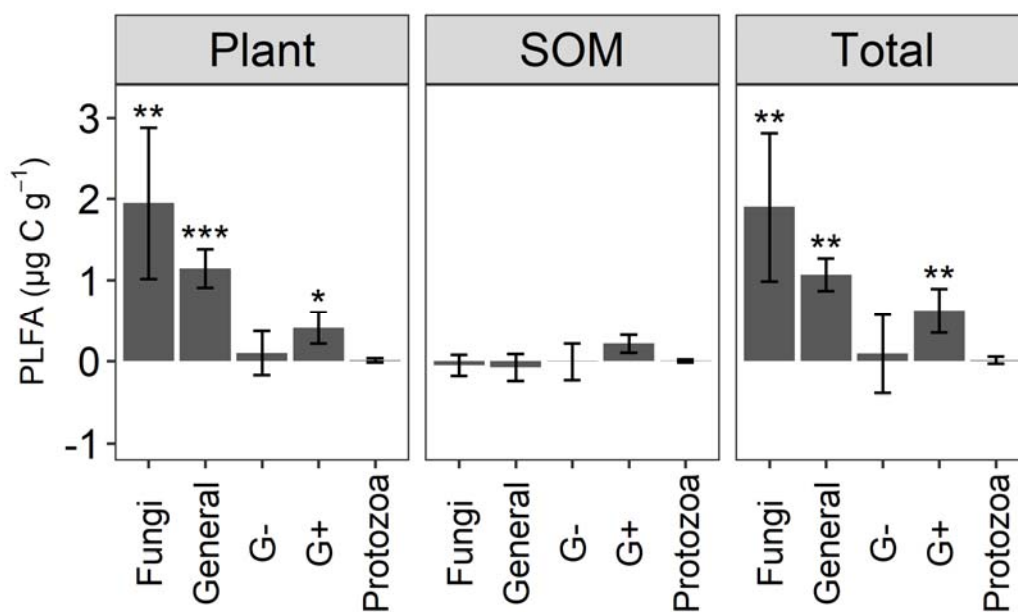

321

322 **Figure 2** Differences in PLFA biomass of key microbial groups between the mixture and the  
323 average of four non-mixture treatments. Positive value means mixture treatment has greater  
324 biomass than the average of non-mixture treatments. The three panels represent the crop derived  
325 PLFA biomass (Plant), the primed SOM derived PLFA biomass (SOM), and the total PLFA biomass  
326 (Total). Error bars are standard deviations. General, G+, and G- represent general bacteria, Gram-  
327 positive and Gram-negative bacteria, respectively. \*, \*\*, or \*\*\* means significantly different from  
328 zero at the level  $P < 0.05$ ,  $0.01$  or  $0.001$ .

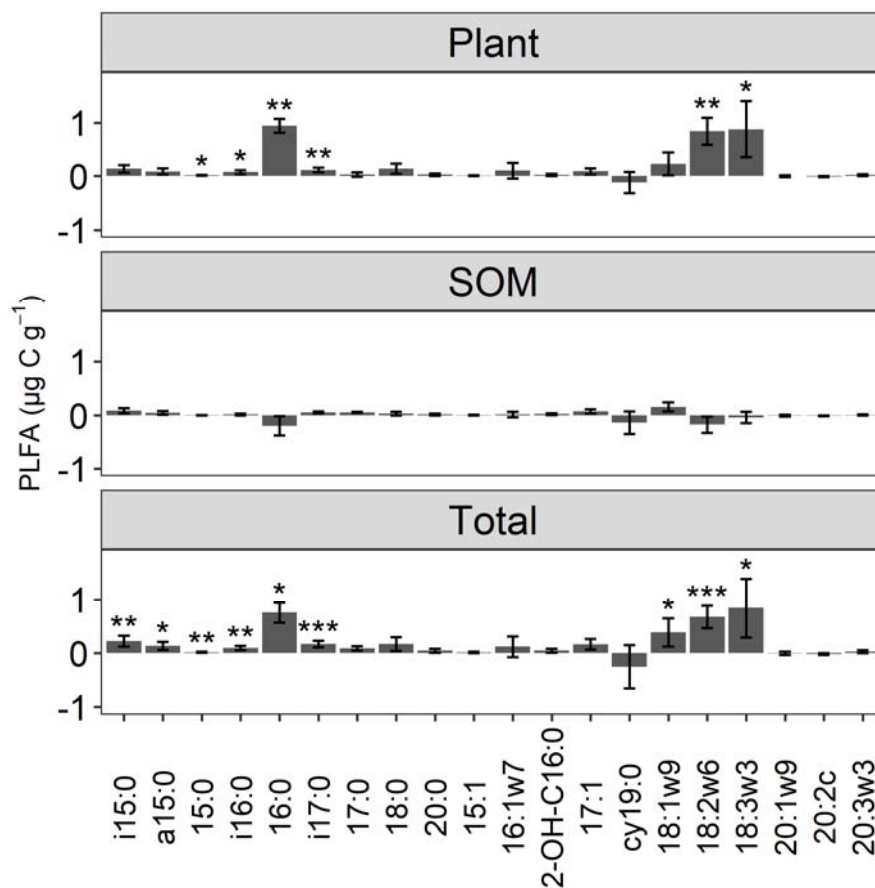

329

330 **Figure 3** Differences in PLFA biomarker biomass between the mixture and the average of  
331 four non-mixture treatments. Positive values indicate that mixture has a greater biomass than the  
332 average of four non-mixtures. The three panels represent the crop residue derived PLFA biomass  
333 (Plant), the primed SOM derived PLFA biomass (SOM), and the total PLFA biomass (Total). Error  
334 bars are standard deviations. \*, \*\*, and \*\*\* indicates significantly different from zero at the level  $P$   
335  $< 0.05$ ,  $0.01$ , and  $0.001$ , respectively.

336

337 One-way ANOSIM results demonstrated that microbial community structure in the mixture  
338 was significantly ( $P < 0.001$ ,  $R = 0.326$ ) different from that in the average of four non-  
339 mixture (Figure 4).

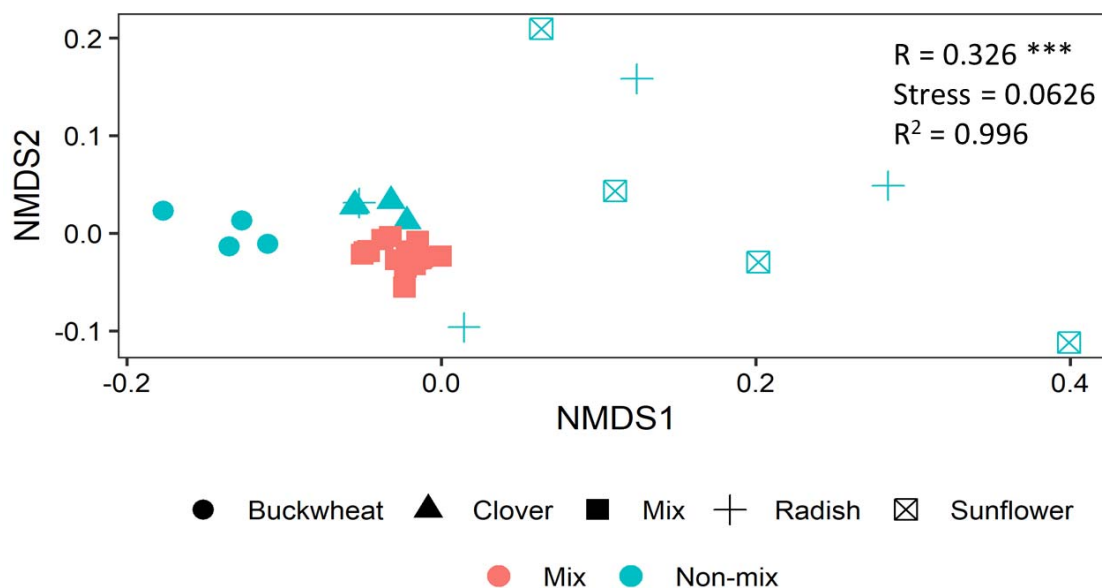

340

341 **Figure 4** *Microbial community structure in the mixture and non-mixture treatments. Non-*  
342 *metric multidimensional scaling (NMDS) on the Bray-Curtis distance on the Hellinger transformed*  
343 *PLFA data. Each symbol represents one sample. In the non-mixture treatment, different shapes*  
344 *represent different crop species. R value followed by “\*\*\*” indicates significant ( $P < 0.001$ )*  
345 *difference between the mixture and the average of four non-mixture treatments analysed by one-*  
346 *way ANOSIM.*

347

### 348 3.3 Mixing crop residues increased the PLFA biomass derived from crop residues

349 Applying  $^{13}\text{C}$  labelled cover residues allowed us to distinguish the microbial biomass derived  
350 from plant residues from other resources. The results showed that application of crop  
351 residues in the mixture and the average of four non-mixture treatments resulted in 6.34 and  
352  $2.73 \mu\text{g C g}^{-1}$  PLFA biomass derived from crop residues, respectively (Figure 1). We observed  
353 a significantly ( $P < 0.05$ ) greater crop residue derived PLFA, by 132% ( $3.61 \mu\text{g C g}^{-1}$ ), in the  
354 mixture treatment, compared to the average of four non-mixture treatments (Figure 1).

355 The mixture exhibited a significantly ( $P < 0.01$ ) greater biomass of general bacteria, Gram-  
356 positive bacteria, and fungi derived from crop residues, by 193% ( $1.15 \mu\text{g C g}^{-1}$ ), 86% ( $0.41$   
357  $\mu\text{g C g}^{-1}$ ), and 158% ( $1.95 \mu\text{g C g}^{-1}$ ), respectively, compared to the average of four non-

358 mixture treatment (Figure 2 and Table 2). The biomass of 16:0, 18:2 $\omega$ 6, and 18:3 $\omega$ 3 in the  
359 mixture treatment were significantly ( $P < 0.05$ ) greater than those in the average of non-  
360 mixture treatments (Figure 3). Based on the differences in PLFA biomass derived from crop  
361 residues, there was no significant differences in either the fungi to bacteria ratio, or the  
362 Gram-positive to Gram-negative bacteria ratio, between mixture and the average of four  
363 non-mixture treatments (Figure S2 and S3).

### 364 **3.4 Mixing crop residues did not increase the PLFA biomass derived from primed SOM**

365 The PLFA biomass derived from primed SOM was the difference between total PLFA, PLFA in  
366 the control soil, and the PLFA derived from plant residues which was tracked by  $^{13}\text{C}$ . The  
367 results showed that the PLFA biomass derived from primed SOM was 3.90 and 3.82  $\mu\text{g C g}^{-1}$   
368 for the mixture and the average of four non-mixture treatments, respectively (Figure 1).  
369 Therefore, we observed only 2% (0.08  $\mu\text{g C g}^{-1}$ ) greater PLFA biomass derived from primed  
370 SOM between the mixture and the average of four non-mixture treatments which was not  
371 statistically significant (Figure 1 and Table 2). None of the microbial groups or the  
372 corresponding PLFA biomarkers exhibited significant differences between the mixture and  
373 the average of four non-mixtures in terms of SOM priming (Figure 2 and 3). There were no  
374 significant differences in either the fungi to bacteria ratio or the Gram-positive to Gram-  
375 negative bacteria of PLFA derived from primed SOM between the mixture and the average  
376 of four non-mixture treatments (Figure S2 and S3).

## 377 **4. Discussion**

378 Following the addition of  $^{13}\text{C}$ -labelled residues, we compared the effect of mixing crop  
379 residues with the effect of applying the residues of a single crop species, on the soil  
380 microbial community composition and attributed the source of the C assimilated by the

381 microbial biomass. Applying crop residues as a mixture resulted in a significantly ( $P < 0.05$ )  
382 greater microbial biomass compared to the average effect of applying each of the residues  
383 individually, indicating a synergistic effect of crop residue diversity on soil microbial biomass  
384 (Figure 1). This result was consistent with a microcosm experiment which found 38.2%  
385 higher soil microbial biomass N in soils receiving a mixture of residues than would be  
386 expected from residues of individual species (Mao et al., 2017). The mixture also exhibited  
387 greater total microbial biomass than any of the non-mixture treatments (Figure S4),  
388 suggesting its synergistic effect is more likely to be caused by facilitation between residues  
389 rather than by the disproportionate effect of individual species. The common explanation in  
390 the literature for why a mixture induces synergistic effect on decomposition rate is that N is  
391 transferred from low C/N residues to high C/N residues to satisfy microbial stoichiometric  
392 requirement (Gartner and Cardon, 2004; Mao et al., 2017). If the availability of N is the  
393 limiting factor in our experiment, we would see the treatment receiving clover residues  
394 (which had the highest C/N ratio) exhibiting the smallest microbial biomass. On the contrary,  
395 the total microbial biomass in the treatment receiving clover residue (where C/N ratio was  
396 32) was significantly ( $P < 0.05$ ) greater than the treatment receiving buckwheat residue  
397 (where C/N ratio was 10) (Figure S4), implying that N transfer between high C/N and low  
398 C/N residues to satisfy microbial stoichiometric requirement may not be the reason for the  
399 observed synergistic effects of the mixture.

400 Although crop residues, such as buckwheat and sunflower in our study, contain high amount  
401 of N, they could also contain a considerable amount of plant secondary metabolites (e.g.,  
402 tannins and terpenes) that suppress microbial resource assimilation (Gessner et al., 2010) or  
403 require specialized enzymes to be degraded (Chomel et al., 2016). When mixing residues,

404 microorganisms could acquire energy via decomposing labile C from other residues to  
405 synthesize enzymes to degrade these secondary metabolites, and then anabolise  
406 subsequent monomers in their biomass (Wang et al., 2015). Additionally, micronutrients  
407 (e.g., Mg and Ca) were identified to play a paramount role in regulating nutrient transfer  
408 between residues (García-Palacios et al., 2016). This includes positive effects of Ca on the  
409 growth and activity of white rot fungi and significant effects of Mg on invertebrate (e.g.,  
410 nematodes) diets which may influence the soil microbial community composition (García-  
411 Palacios et al., 2016). Thus, we suggested that the non-additive effect induced by the  
412 mixture was not predominantly controlled by residue bulk elemental composition (C/N  
413 ratio); instead, it could have been driven by the chemical composition of residues, including  
414 plant secondary metabolites and micronutrients.

415 We found that the greater microbial biomass in soils receiving residue mixtures, compared  
416 to individual residues, can largely be attributed to C assimilated directly from the plant  
417 residues, rather than C obtained by enhanced priming of SOM (Figure 1). Microbial  
418 communities preferentially mineralise labile compounds after crop residues are applied to  
419 soils to build their biomass rather than decomposing pre-existing SOM (Ball et al., 2014).  
420 Significantly greater crop residue-derived C was observed in biomarkers 16:0, 18:2 $\omega$ 6 and  
421 18:3 $\omega$ 3 in the soils amended with crop residue mixtures, compared to soils receiving  
422 individual residues (Figure 3). This finding is supported by the knowledge that biomarker  
423 16:0 represents microbial groups that primarily build their biomass from crop derived C  
424 (Wang et al., 2014). Although 16:0 was widely accepted as general bacterial biomarker, it  
425 also found in crops (Willers et al., 2015). There is a possibility that this biomarker was  
426 present as part of the tissues of our cover crops. Therefore, future studies combining stable

427 isotope probing and DNA fingerprints would overcome this uncertainty associated with the  
428 PLFA approach (Blagodatskaya and Kuzyakov, 2013). We found that fungi (e.g., biomarker  
429 18:2 $\omega$ 6 and 18:3 $\omega$ 3) were particularly efficient in assimilating a mixture of crop residue-  
430 derived C (Figure 3). This could be because fungal hyphae networks allow nutrients to be  
431 transported between microsites in the chemically and spatially heterogenous environment  
432 resulting from mixed residues (Ball et al., 2014). Furthermore, fungi can produce a wide  
433 range of extracellular enzymes that can degrade compounds which are recalcitrant for other  
434 microbes (Voriskova and Baldrian, 2013). By contrast, Gram-negative bacteria (e.g., 16:1 $\omega$ 5  
435 and 16:1 $\omega$ 7) are good at incorporating SOM derived C into their biomass (Nottingham et al.,  
436 2009).

437 Although the application of crop residues did induce microbial assimilation of the native  
438 SOM, the magnitude of assimilation was not significantly changed by mixing crop residues  
439 (Figure 1 and 2). This observation was contrary to a previous assertion that mixtures of plant  
440 residues with a wide spectrum of labile compounds may support a higher microbial biomass  
441 and produce more extracellular enzymes, consequently enhancing the potential to prime  
442 the decomposition of recalcitrant compounds in SOM (Meier and Bowman, 2008). The lack  
443 of a marked mixture-induced priming effect could, however, be because the amount of C  
444 added was the same in all treatments. A recent meta-analysis, which analysed studies  
445 applying a range of organic C application rates, up to 3 mg C g<sup>-1</sup>, reported that the  
446 magnitude of the priming effect significantly increased with the increasing rate of additions,  
447 but was not affected by different residue types (Sun et al., 2019).

448 We made our observations only one day after crop residues were applied to soils because  
449 we were interested in identifying the microbial groups which incorporate plant derived C



450 directly into their biomass by anabolism, rather than secondary turnover of C from microbial  
451 necromass, which could continue for months or years (Gunina and Kuzyakov, 2015). If  
452 incubating longer until the exhaustion of available C, then mixture treatments which have a  
453 larger microbial biomass, may facilitate a stronger priming effect because of the increased  
454 need for nutrients to maintain microbial survival (Yu et al., 2020).

455 Our study revealed that the incorporation of crop residue mixtures increased the total  
456 microbial biomass during the first day after application to a greater extent than would be  
457 expected by the addition of the same quantity of C from a single species residue. This  
458 additional microbial biomass is mostly derived from the crop residues themselves, rather  
459 than primed SOM. It is not clear whether the reason for this greater microbial biomass is  
460 due to faster metabolism of the residues, or higher carbon use efficiency (CUE) of the  
461 microorganisms responsible. We also found that soil respiration rates one day after applying  
462 crop residues were not significantly ( $P < 0.05$ ) different between the mixture and the  
463 average of four non-mixtures (Figure S7). If the mechanism of higher CUE is responsible (or  
464 even partially responsible), then applying a mixture of crop residues to soils may help to  
465 increase SOC stocks in arable soils because more crop residue-derived C enters the microbial  
466 biomass and less is respired as CO<sub>2</sub> (Figure S7) and the larger microbial biomass may result  
467 in a larger microbial necromass and, ultimately, more SOM. Therefore, land management  
468 practices that involve the incorporation of a mixture of crop residues (such as growing cover  
469 crop mixtures in polyculture after monoculture crop harvest and before planting the  
470 following monoculture crop) may be beneficial for increasing soil C stocks and climate  
471 change mitigation.

## 472 **5. Conclusion**

473 Mixing of crop residues produced a synergistic effect on total soil microbial biomass because  
474 fungi, general bacteria, and Gram-positive bacteria were able to incorporate plant-derived C  
475 directly into their biomass to a greater extent than when applying individual crop residues.  
476 These findings may be due to a better balance of nutrient inputs provided by mixtures, and  
477 broader niche for microorganism to colonise. Residue addition primed native SOM, but  
478 mixing residues resulted in an additive effect on microbial biomass C resulting from primed  
479 SOM. If the greater soil microbial biomass from residue mixtures results in greater microbial  
480 necromass and does not result in later priming of native SOM, then applying a mixture of  
481 crop residues to soils (e.g., incorporating or growing a cover crop polyculture) could be a  
482 sustainable agricultural practice to enhance SOC storage in arable soils.

## 483 **Acknowledgements**

484 This research was supported by a Biotechnology and Biological Sciences Research Council  
485 New Investigator Grant (BB/R006989/1) awarded to Tom Sizmur. The authors wish to thank  
486 Paul Brown from Kings Crops, a division of Frontier Agriculture Ltd, for supplying cover crop  
487 seed, and the Isolife (Wageningen, Netherland) for growing and labelling the cover crops.  
488 We acknowledge the assistance of Andrew Dodson, Anne Dudley, Karen Gutteridge,  
489 Fengjuan Xiao, Marta O'Brian, Sean Coole with laboratory analysis, and Dedy Antony, Alex  
490 Adetunji Adekanmbi and Chinonso Chukwuma Ogbuagu with soil sampling.

## 491 **Supplementary information**

492 A Supplementary information document is provided which contains 3 tables and 7 figures

## 493 **References**

- 494 Adekanmbi, A.A., Shaw, L.J., Sizmur, T., 2020. Effect of Sieving on Ex Situ Soil Respiration of  
495 Soils from Three Land Use Types. *Journal of Soil Science and Plant Nutrition*.  
496 doi:10.1007/s42729-020-00177-2
- 497 Ball, B.A., Carrillo, Y., Molina, M., 2014. The influence of litter composition across the litter-  
498 soil interface on mass loss, nitrogen dynamics and the decomposer community. *Soil*  
499 *Biology and Biochemistry* 69, 71–82. doi:10.1016/j.soilbio.2013.10.048
- 500 Bastida, F., Eldridge, D.J., García, C., Kenny Png, G., Bardgett, R.D., Delgado-Baquerizo, M.,  
501 2021. Soil microbial diversity–biomass relationships are driven by soil carbon content  
502 across global biomes. *ISME Journal*. doi:10.1038/s41396-021-00906-0
- 503 Blagodatskaya, E., Kuzyakov, Y., 2013. Active microorganisms in soil: Critical review of  
504 estimation criteria and approaches. *Soil Biology and Biochemistry* 67, 192–211.  
505 doi:10.1016/j.soilbio.2013.08.024
- 506 Castro-Díez, P., Alonso, Á., Romero-Blanco, A., 2019. Effects of litter mixing on litter  
507 decomposition and soil properties along simulated invasion gradients of non-native  
508 trees. *Plant and Soil* 442, 79–96. doi:10.1007/s11104-019-04160-4
- 509 Chapman, S.K., Newman, G.S., 2010. Biodiversity at the plant-soil interface: Microbial  
510 abundance and community structure respond to litter mixing. *Oecologia* 162, 763–769.  
511 doi:10.1007/s00442-009-1498-3
- 512 Chen, Y., Sun, J., Xie, F., Wang, X., Cheng, G., Lu, X., 2015. Litter chemical structure is more  
513 important than species richness in affecting soil carbon and nitrogen dynamics  
514 including gas emissions from an alpine soil. *Biology and Fertility of Soils* 51, 791–800.

515        doi:10.1007/s00374-015-1025-0

516        Chomel, M., Guittonny-Larchevêque, M., Fernandez, C., Gallet, C., DesRochers, A., Paré, D.,  
517        Jackson, B.G., Baldy, V., 2016. Plant secondary metabolites: a key driver of litter  
518        decomposition and soil nutrient cycling. *Journal of Ecology* 104, 1527–1541.  
519        doi:10.1111/1365-2745.12644

520        García-Palacios, P., Mckie, B.G., Handa, I.T., Frainer, A., Hättenschwiler, S., 2016. The  
521        importance of litter traits and decomposers for litter decomposition: A comparison of  
522        aquatic and terrestrial ecosystems within and across biomes. *Functional Ecology* 30,  
523        819–829. doi:10.1111/1365-2435.12589

524        Gartner, T.B., Cardon, Z.G., 2004. Decomposition dynamics in mixed-species leaf litter. *Oikos*  
525        104, 230–246. doi:10.1111/j.0030-1299.2004.12738.x

526        Gessner, M.O., Swan, C.M., Dang, C.K., McKie, B.G., Bardgett, R.D., Wall, D.H.,  
527        Hättenschwiler, S., 2010. Diversity meets decomposition. *Trends in Ecology & Evolution*  
528        25, 372–380. doi:10.1016/j.tree.2010.01.010

529        Gunina, A., Kuzyakov, Y., 2015. Sugars in soil and sweets for microorganisms: Review of  
530        origin, content, composition and fate. *Soil Biology and Biochemistry* 90, 87–100.  
531        doi:10.1016/j.soilbio.2015.07.021

532        Kuzyakov, Y., 2010. Priming effects: Interactions between living and dead organic matter.  
533        *Soil Biology and Biochemistry* 42, 1363–1371. doi:10.1016/j.soilbio.2010.04.003

534        Liang, C., Kästner, M., Joergensen, R.G., 2020. Microbial necromass on the rise: The growing  
535        focus on its role in soil organic matter development. *Soil Biology and Biochemistry* 150,

- 536 2018–2021. doi:10.1016/j.soilbio.2020.108000
- 537 Mao, B., Mao, R., Zeng, D.H., 2017. Species diversity and chemical properties of litter  
538 influence non-Additive effects of litter mixtures on soil carbon and nitrogen cycling.  
539 PLoS ONE 12, 1–19. doi:10.1371/journal.pone.0180422
- 540 Meier, C.L., Bowman, W.D., 2008. Links between plant litter chemistry, species diversity, and  
541 below-ground ecosystem function. Proceedings of the National Academy of Sciences of  
542 the United States of America 105, 19780–19785. doi:10.1073/pnas.0805600105
- 543 Norton, J.M., Schimel, J.P., 2011. Nitrogen mineralization-immobilization turnover, in:  
544 Huang, P.M. (Ed.), Handbook of Soil Science. CRC Press, pp. 1–51.
- 545 Nottingham, A.T., Griffiths, H., Chamberlain, P.M., Stott, A.W., Tanner, E.V.J., 2009. Soil  
546 priming by sugar and leaf-litter substrates: A link to microbial groups. Applied Soil  
547 Ecology 42, 183–190. doi:10.1016/j.apsoil.2009.03.003
- 548 Oksanen, J., Blanchet, F.G., Friendly, M., Kindt, R., Legendre, P., McGlenn, D., Minchin, P.R.,  
549 O’Hara, R.B., Simpson, G.L., Solymos, P., Stevens, M.H.H., Szoecs, E., Wagner, H., 2019.  
550 vegan: Community Ecology Package.
- 551 Porre, R.J., van der Werf, W., De Deyn, G.B., Stomph, T.J., Hoffland, E., 2020. Is litter  
552 decomposition enhanced in species mixtures? A meta-analysis. Soil Biology and  
553 Biochemistry 145, 107791. doi:10.1016/j.soilbio.2020.107791
- 554 R Core Team, 2018. R: A Language and Environment for Statistical Computing.
- 555 Redin, M., Recous, S., Aita, C., Dietrich, G., Skolaude, A.C., Ludke, W.H., Schmatz, R.,  
556 Giacomini, S.J., 2014. How the chemical composition and heterogeneity of crop residue

- 557 mixtures decomposing at the soil surface affects C and N mineralization. *Soil Biology*  
558 *and Biochemistry* 78, 65–75. doi:10.1016/j.soilbio.2014.07.014
- 559 Rubino, M., Dungait, J.A.J., Evershed, R.P., Bertolini, T., De Angelis, P., D’Onofrio, A.,  
560 Lagomarsino, A., Lubritto, C., Merola, A., Terrasi, F., Cotrufo, M.F., 2010. Carbon input  
561 belowground is the major C flux contributing to leaf litter mass loss: Evidences from a  
562 <sup>13</sup>C labelled-leaf litter experiment. *Soil Biology and Biochemistry* 42, 1009–1016.  
563 doi:10.1016/j.soilbio.2010.02.018
- 564 Shahbaz, M., Kumar, A., Kuzyakov, Y., Börjesson, G., Blagodatskaya, E., 2018. Interactive  
565 priming effect of labile carbon and crop residues on SOM depends on residue  
566 decomposition stage: Three-source partitioning to evaluate mechanisms. *Soil Biology*  
567 *and Biochemistry* 126, 179–190. doi:10.1016/j.soilbio.2018.08.023
- 568 Sizmur, T., Tilston, E.L., Charnock, J., Palumbo-Roe, B., Watts, M.J., Hodson, M.E., 2011.  
569 Impacts of epigeic, anecic and endogeic earthworms on metal and metalloid mobility  
570 and availability. *Journal of Environmental Monitoring* 13, 266–273.  
571 doi:10.1039/c0em00519c
- 572 Sun, Z., Liu, S., Zhang, T., Zhao, X., Chen, S., Wang, Q., 2019. Priming of soil organic carbon  
573 decomposition induced by exogenous organic carbon input: a meta-analysis. *Plant and*  
574 *Soil* 443, 463–471. doi:10.1007/s11104-019-04240-5
- 575 Voriskova, J., Baldrian, P., 2013. Fungal community on decomposing leaf litter undergoes  
576 rapid successional changes. *ISME Journal* 7, 477–486. doi:10.1038/ismej.2012.116
- 577 Wang, H., Boutton, T.W., Xu, W., Hu, G., Jiang, P., Bai, E., 2015. Quality of fresh organic

578 matter affects priming of soil organic matter and substrate utilization patterns of  
579 microbes. *Scientific Reports* 5, 1–13. doi:10.1038/srep10102

580 Wang, Q., Wang, S., He, T., Liu, L., Wu, J., 2014. Response of organic carbon mineralization  
581 and microbial community to leaf litter and nutrient additions in subtropical forest soils.  
582 *Soil Biology and Biochemistry* 71, 13–20. doi:10.1016/j.soilbio.2014.01.004

583 Willers, C., Jansen van Rensburg, P.J., Claassens, S., 2015. Phospholipid fatty acid profiling of  
584 microbial communities-a review of interpretations and recent applications. *Journal of*  
585 *Applied Microbiology* 119, 1207–1218. doi:10.1111/jam.12902

586 Xiao, C., Guenet, B., Zhou, Y., Su, J., Janssens, I.A., 2015. Priming of soil organic matter  
587 decomposition scales linearly with microbial biomass response to litter input in steppe  
588 vegetation. *Oikos* 124, 649–657. doi:10.1111/oik.01728

589 Yu, G., Zhao, H., Chen, J., Zhang, T., Cai, Z., Zhou, G., Li, Z., Qiu, Z., Wu, Z., 2020. Soil  
590 microbial community dynamics mediate the priming effects caused by in situ  
591 decomposition of fresh plant residues. *Science of the Total Environment* 737, 139708.  
592 doi:10.1016/j.scitotenv.2020.139708

593 Zhang, X., Xin, X., Yang, W., Zhu, A., Ding, S., 2019. Short-term decomposition, turnover and  
594 retention of residue-derived carbon are influenced by the fertility level in a sandy loam  
595 soil. *Geoderma* 349, 68–78. doi:10.1016/j.geoderma.2019.04.043

596
